# Supplementary material for: Clinical and Molecular Characteristics of Childhood-Onset Stargardt Disease
Source: PubMed Central journal article supplement (PMC4459618; doi:10.1016/j.ophtha.2014.08.012), 2014-10-12
Supplement: NIHMS693250-supplement-Table_2.pdf [file NIHMS693250-supplement-Table_2.pdf]

**Table 2. Summary of Clinical Findings at Baseline and Molecular Status of 42 patients with Childhood-onset Stargardt Disease**

| Pt               | Onset (yrs) | Age at Baseline (yrs) | LogMAR VA |      | Fds type | AF type | OCT                   |     | ERG group | Genotype group | Mutation Status                        |
|------------------|-------------|-----------------------|-----------|------|----------|---------|-----------------------|-----|-----------|----------------|----------------------------------------|
|                  |             |                       | R         | L    |          |         | CFT ( $\mu\text{m}$ ) |     |           |                |                                        |
|                  |             |                       |           |      |          |         | R                     | L   |           |                |                                        |
| 1*               | 4           | 6                     | 1.00      | 0.78 | 3b       | NA      | NA                    | NA  | 3         | NA             | No variants                            |
| 2*               | 6           | 7                     | 0.48      | 0.48 | 1        | NA      | NA                    | NA  | 1         | B              | p.[Arg653Cys];[Arg2030*]               |
| 3*               | 7           | 7                     | 1.30      | 1.20 | 3b       | 2       | 60                    | 45  | 3         | A              | c.[6479+1G>A];[6479+1G>A]              |
| 4*               | 3           | 7                     | 0.10      | 0.20 | 3b       | NA      | NA                    | NA  | 3         | NA             | No variants                            |
| 5*               | 5           | 8                     | 1.00      | 1.00 | 3b       | 2       | NA                    | NA  | 3         | A              | <b>p.[Glu905fs];[Glu905fs]</b>         |
| 6                | 7           | 8                     | 1.30      | 1.40 | 3b       | 2       | 49                    | 44  | NA        | A              | <b>p.[Arg1097*];c.[5196+1G&gt;A]</b>   |
| 7                | 7           | 8                     | 0.48      | 0.40 | 3a       | 1       | 46                    | 38  | 1         | B              | p.[Arg212Cys];c.[5461-10T>C]           |
| 8*               | 6           | 8                     | 0.48      | 0.48 | 3a       | 2       | NA                    | NA  | 3         | A              | <b>p.[Tyr1027*];[Tyr1027*]</b>         |
| 9                | 7           | 9                     | 0.60      | 0.20 | 3b       | 2       | 61                    | 67  | NA        | B              | p.[Cys1490Tyr];c.[5461-10T>C]          |
| 10               | 8           | 9                     | 0.70      | 0.70 | 3b       | 2       | 69                    | 65  | 3         | B              | p.[Glu1087Lys];c.[5461-10T>C]          |
| 11               | 9           | 9                     | 0.48      | 0.48 | 3b       | 2       | NA                    | NA  | 3         | C              | p.[Arg1108Cys];[Cys1490Tyr]            |
| 12               | 8           | 9                     | 1.00      | 1.00 | 3b       | 2       | NA                    | NA  | 1         | NA             | <b>p.Cys519*</b>                       |
| 13               | 7           | 9                     | 0.48      | 0.48 | 3a       | 1       | 35                    | 45  | NA        | C              | p.[Arg1108Cys];[Thr1526Met]            |
| 14               | 8           | 9                     | 0.60      | 0.48 | 3b       | 2       | NA                    | NA  | 1         | C              | p.[His1406Tyr];[Trp1408Arg;Arg1640Trp] |
| 15               | 5           | 10                    | 0.80      | 0.80 | 3a       | 1       | 54                    | 54  | 3         | NA             | c.5461-10T>C                           |
| 16               | 8           | 10                    | 1.00      | 1.00 | 3b       | 2       | NA                    | NA  | NA        | B              | p.[Tyr954Ser];c.[5461-10T>C]           |
| 17* <sup>†</sup> | 5           | 10                    | 0.30      | 0.30 | 3b       | 2       | 72                    | 81  | NA        | B              | c.[768G>T];p.[Cys1455Arg]              |
| 18 <sup>†</sup>  | 9           | 11                    | 0.50      | 0.40 | 3b       | 2       | 94                    | 107 | 3         | A              | p.[Gln636*];c.[5461-10T>C]             |

|     |    |    |      |      |    |    |     |     |    |    |                                       |
|-----|----|----|------|------|----|----|-----|-----|----|----|---------------------------------------|
| 19  | 9  | 11 | 0.30 | 0.30 | 3a | NA | NA  | NA  | 3  | NA | No variants                           |
| 20  | 10 | 11 | 0.78 | 0.78 | 3b | 2  | 61  | 66  | 3  | A  | <b>p.[Gln8fs]</b> ;c.[5461-10T>C]     |
| 21  | 10 | 11 | 0.54 | 0.12 | 2  | 2  | 61  | 70  | 1  | B  | p.[Trp439*];[Pro1380Leu]              |
| 22  | 8  | 11 | 1.00 | 1.00 | 3b | 2  | NA  | NA  | NA | B  | c.[5461-10T>C];p.[Leu2027Phe]         |
| 23  | 12 | 12 | 0.18 | 0.18 | 3b | NA | NA  | NA  | 1  | NA | No variants                           |
| 24  | 11 | 12 | 1.00 | 0.90 | 3b | 2  | 37  | 41  | NA | B  | p.[Cys1455Arg];c.[5714+5G>A]          |
| 25  | 8  | 12 | 1.30 | 1.30 | 3b | 2  | 78  | 84  | NA | B  | p.[Gly863Ala(;Glu1122Lys(;Arg2030*)]  |
| 26  | 3  | 12 | 1.00 | 1.00 | 3a | 2  | NA  | NA  | NA | C  | p.[Gly550Arg];[Cys2150Tyr]            |
| 27  | 9  | 13 | 0.50 | 0.60 | 3a | 1  | 138 | 140 | 1  | B  | p.[Gly863Ala]; <b>[Thr1721fs]</b>     |
| 28* | 6  | 13 | 1.30 | 1.10 | 3b | 2  | 33  | 35  | 3  | C  | p.[Glu1022Lys];[Glu1022Lys]           |
| 29  | 8  | 13 | 1.00 | 1.18 | 3b | NA | NA  | NA  | NA | B  | <b>p.[Arg587Lys]</b> ;[Trp855*]       |
| 30  | 11 | 14 | 0.90 | 0.80 | 3b | 2  | 73  | 67  | NA | A  | p.[Gln636*]; <b>c.[6817-2A&gt;C]</b>  |
| 31  | 12 | 14 | 0.48 | 0.48 | 3a | 1  | NA  | NA  | 1  | C  | p.[Thr1019Met];[Gly1961Glu]           |
| 32  | 10 | 14 | 1.00 | 1.00 | NA | NA | NA  | NA  | 3  | B  | c.[5018+2T>C]; <b>p.[Ser2072Asn]</b>  |
| 33  | 11 | 14 | 0.18 | 0.20 | 3a | 1  | 126 | 134 | 1  | B  | p.[Gly1961Glu];c.[6729+4_6729+18del]  |
| 34  | 12 | 15 | 1.00 | 1.00 | 3b | 2  | 48  | 49  | 3  | C  | p.[Pro1380Leu]; <b>[Tyr1770Asp]</b>   |
| 35  | 12 | 15 | 0.50 | 0.50 | 3a | 1  | 46  | 50  | 3  | NA | p.Gly1961Glu                          |
| 36  | 12 | 15 | 1.00 | 1.00 | 3b | 2  | 60  | 55  | 2  | C  | p.[Arg653Cys];[Pro1380Leu]            |
| 37  | 14 | 15 | 0.18 | 0.18 | 3b | 1  | 44  | 51  | NA | C  | p.[Arg511Cys(;Ala1739dup(;Gly1961Glu] |
| 38  | 13 | 15 | 1.00 | 1.00 | 3b | NA | NA  | NA  | NA | C  | <b>p.[Met1066Arg]</b> ;[Cys1490Tyr]   |
| 39  | 12 | 15 | 0.80 | 0.80 | 3b | 1  | NA  | NA  | NA | C  | <b>p.[Asp586Gly]</b> ;[Gly1961Glu]    |
| 40  | 16 | 16 | 0.48 | 0.48 | NA | NA | NA  | NA  | NA | NA | p.Leu2027Phe                          |
| 41  | 13 | 16 | 1.00 | 1.00 | NA | NA | NA  | NA  | NA | B  | c.[5461-10T>C];p.[Leu2027Phe]         |

42 14 16 0.18 0.18 3a 1 NA NA NA C p.[Arg1129Cys];[Cys1490Tyr]

---

AF type = autofluorescence type; CFT = central foveal thickness; ERG = electroretinogram; Fds type = fundus type; L = left; LogMAR VA = logarithm of the minimum angle of resolution visual acuity; NA = not available; OCT = optical coherence tomography; Pt = patient; R = right.

The age of onset was defined as either the age at which visual loss was first noted by the patient or in the asymptomatic patients when abnormal retinal appearance was first detected.

The CFT was defined as the distance between the inner retinal surface and inner border of the retinal pigment epithelium at the central fovea.

\* Eight patients were from consanguineous families.

†Two patients have been partially described in a previous case report (patients 17 and 18).<sup>9</sup>

Variants shown in bold are putative novel.
