# Supplementary material for: Clinical and Molecular Characteristics of Childhood-Onset Stargardt Disease
Source: PubMed Central journal article supplement (PMC4459618; doi:10.1016/j.ophtha.2014.08.012), 2014-10-12
Supplement: NIHMS693250-supplement-Table_3.pdf [file NIHMS693250-supplement-Table_3.pdf]

**Table 3. Detailed Changes of Visual Acuity, Fundus Appearance, Autofluorescence Pattern during the Follow-up Interval of 42 patients with Childhood-onset Stargardt Disease**

| Pt | LogMAR VA |      |      |           |      |      | Fds type  |           |                 |           | AF type   |           |           |                 |    |
|----|-----------|------|------|-----------|------|------|-----------|-----------|-----------------|-----------|-----------|-----------|-----------|-----------------|----|
|    | BL        |      | FU   |           | BL   |      | FU        |           | Type transision | BL        |           | FU        |           | Type transision |    |
|    | Age (yrs) | R    | L    | Age (yrs) | R    | L    | Age (yrs) | Age (yrs) |                 | Age (yrs) | Age (yrs) | Age (yrs) | Age (yrs) |                 |    |
| 1  | 6         | 1.00 | 0.78 |           | NA   |      | 6         | 3b        | 13              | 3b        |           | NA        |           | NA              |    |
| 2  | 7         | 0.48 | 0.48 |           | NA   |      | 7         | 1         |                 | NA        |           | NA        |           | NA              |    |
| 3  | 7         | 1.30 | 1.20 |           | NA   |      | 9         | 3b        | 10              | 3b        |           | 9         | 2         | 10              | 2  |
| 4  | 7         | 0.10 | 0.20 | 12        | 0.05 | 0.20 | 10        | 3b        | 12              | 3b        |           | NA        |           | NA              |    |
| 5  | 8         | 1.00 | 1.00 |           | NA   |      | 9         | 3b        |                 | NA        |           | 9         | 2         |                 | NA |
| 6  | 8         | 1.30 | 1.40 |           | NA   |      | 11        | 3b        |                 | NA        |           | 11        | 2         |                 | NA |
| 7  | 8         | 0.48 | 0.40 | 14        | 0.80 | 0.70 | 9         | 3a        | 14              | 3b        | ✓         | 9         | 1         | 14              | 1  |
| 8  | 8         | 0.48 | 0.48 | 15        | 1.40 | 1.60 | 16        | 3a        |                 | NA        |           | 16        | 2         |                 | NA |
| 9  | 9         | 0.60 | 0.20 | 13        | 1.10 | 1.00 | 9         | 3b        | 12              | 3b        |           | 9         | 2         | 13              | 2  |
| 10 | 9         | 0.70 | 0.70 | 13        | 1.10 | 1.20 | 9         | 3b        |                 | NA        |           | 9         | 2         | 13              | 2  |
| 11 | 9         | 0.48 | 0.48 | 14        | 1.30 | 1.20 | 9         | 3b        | 13              | 3b        |           | 9         | 2         | 13              | 2  |
| 12 | 9         | 1.00 | 1.00 | 14        | 1.10 | 0.90 | 10        | 3b        | 13              | 3b        |           | 10        | 2         | 12              | 2  |
| 13 | 9         | 0.48 | 0.48 | 16        | 0.80 | 0.80 | 10        | 3a        | 14              | 3b        | ✓         | 10        | 1         | 16              | 1  |
| 14 | 9         | 0.60 | 0.48 | 16        | 1.00 | 1.00 | 10        | 3b        |                 | NA        |           | 10        | 2         |                 | NA |
| 15 | 10        | 0.80 | 0.80 |           | NA   |      | 10        | 3a        |                 | NA        |           | 10        | 1         |                 | NA |
| 16 | 10        | 1.00 | 1.00 | 11        | 1.00 | 1.10 | 11        | 3b        |                 | NA        |           | 11        | 2         |                 | NA |
| 17 | 10        | 0.30 | 0.30 | 14        | 0.30 | 0.30 | 10        | 3b        |                 | NA        |           | 10        | 2         |                 | NA |

|    |    |      |      |    |      |      |    |    |    |    |    |    |    |    |    |
|----|----|------|------|----|------|------|----|----|----|----|----|----|----|----|----|
| 18 | 11 | 0.50 | 0.40 |    | NA   |      | 11 | 3b | NA |    | 11 | 2  | NA |    |    |
| 19 | 11 | 0.30 | 0.30 |    | NA   |      | 11 | 3a | NA |    | NA |    | NA |    |    |
| 20 | 11 | 0.78 | 0.78 |    | NA   |      | 11 | 3b | 12 | 3b |    | 11 | 2  | 12 | 2  |
| 21 | 11 | 0.54 | 0.12 | 13 | 0.80 | 0.30 | 13 | 2  | NA |    |    | 13 | 2  |    | NA |
| 22 | 11 | 1.00 | 1.00 | 16 | 1.00 | NA   | 13 | 3b | 15 | 3b |    | 15 | 2  |    | NA |
| 23 | 12 | 0.18 | 0.18 |    | NA   |      | 16 | 3b | NA |    |    | NA |    |    | NA |
| 24 | 12 | 1.00 | 0.90 | 15 | 1.00 | 1.00 | 12 | 3b | 15 | 3b |    | 12 | 2  | 15 | 2  |
| 25 | 12 | 1.30 | 1.30 | 16 | 1.30 | 1.18 | 12 | 3b | 15 | 3b |    | 13 | 2  | 16 | 2  |
| 26 | 12 | 1.00 | 1.00 | 16 | 1.00 | 1.00 | 12 | 3a | 16 | 3b | ✓  | 16 | 2  |    | NA |
| 27 | 13 | 0.50 | 0.60 |    | NA   |      | 13 | 3a | NA |    |    | 13 | 1  |    | NA |
| 28 | 13 | 1.30 | 1.10 | 15 | 1.10 | 0.88 | 14 | 3b | NA |    |    | 14 | 2  | 15 | 2  |
| 29 | 13 | 1.00 | 1.18 | 16 | 0.78 | 0.78 | 15 | 3b | NA |    |    | NA |    |    | NA |
| 30 | 14 | 0.90 | 0.80 |    | NA   |      | 15 | 3b | NA |    |    | 15 | 2  |    | NA |
| 31 | 14 | 0.48 | 0.48 |    | NA   |      | 14 | 3a | NA |    |    | 14 | 1  |    | NA |
| 32 | 14 | 1.00 | 1.00 | 15 | 1.00 | 1.00 |    | NA | NA |    |    | NA |    |    | NA |
| 33 | 14 | 0.18 | 0.20 | 16 | 0.36 | 0.36 | 16 | 3a | NA |    |    | 16 | 1  |    | NA |
| 34 | 15 | 1.00 | 1.00 |    | NA   |      | 15 | 3b | NA |    |    | 15 | 2  |    | NA |
| 35 | 15 | 0.50 | 0.50 |    | NA   |      | 15 | 3a | NA |    |    | 15 | 1  |    | NA |
| 36 | 15 | 1.00 | 1.00 | 16 | 1.00 | 1.00 | 16 | 3b | NA |    |    | 16 | 2  |    | NA |
| 37 | 15 | 0.18 | 0.18 | 16 | 0.75 | 0.56 | 15 | 3b | 16 | 3b |    | 16 | 1  |    | NA |
| 38 | 15 | 1.00 | 1.00 | 16 | 1.08 | 1.00 | 16 | 3b | NA |    |    | NA |    |    | NA |
| 39 | 15 | 0.80 | 0.80 | 16 | 0.80 | 0.80 | 15 | 3b | NA |    |    | 15 | 1  |    | NA |
| 40 | 16 | 0.48 | 0.48 |    | NA   |      |    | NA | NA |    |    | NA |    |    | NA |

|    |    |      |      |    |    |    |    |    |   |    |
|----|----|------|------|----|----|----|----|----|---|----|
| 41 | 16 | 1.00 | 1.00 | NA | NA | NA | NA | NA |   |    |
| 42 | 16 | 0.18 | 0.18 | NA | 16 | 3a | NA | 16 | 1 | NA |

---

AF type = autofluorescence type; BL = baseline; Fds type = fundus type; FU = follow-up; L = left; NA; LogMAR VA = logarithm of the minimum angle of resolution visual acuity; NA = not available; Pt = patient; R = right;
