# Supplementary material for: Clinical and Molecular Characteristics of Childhood-Onset Stargardt Disease
Source: PubMed Central journal article supplement (PMC4459618; doi:10.1016/j.ophtha.2014.08.012), 2014-10-12
Supplement: NIHMS693250-supplement-Table_4.pdf [file NIHMS693250-supplement-Table_4.pdf]

**Table 4. Suggested Pathogenicity of the 46 ABCA4 Variants Identified in Childhood-onset Stargardt Disease**

| Exon/<br>IVS | Nucleotide<br>substitution | Protein<br>change/effect    | Number of alleles<br>identified | Pt        | Reference                                                   | SIFT          | Polyphen2  |                        | HSF             |              | Allelic<br>frequency<br>observed<br>by EVS  | db SNP      |
|--------------|----------------------------|-----------------------------|---------------------------------|-----------|-------------------------------------------------------------|---------------|------------|------------------------|-----------------|--------------|---------------------------------------------|-------------|
|              |                            |                             |                                 |           |                                                             | Prediction    | Prediction | Hum var<br>score (0-1) | Wild type<br>CV | Mutant<br>CV |                                             |             |
| 1            | c.21dupA                   | p.Gln8fs                    | 1                               | 20        | This study                                                  |               |            |                        |                 |              | ND                                          |             |
| 6            | c.634C>T                   | p.Arg212Cys                 | 1                               | 7         | Simonelli F et al. <sup>30</sup>                            | Not tolerated | PRD        | 0.951                  |                 |              | 0.0116                                      | rs61750200  |
| 6            | c.768G>T                   | Splice                      | 1                               | 17        | Klevering et al. <sup>28</sup>                              |               |            |                        | 91.6            | 80.7         | weakens the<br>splice donor<br>site by ~12% | ND          |
| 10           | c.1317G>A                  | p.Trp439*                   | 1                               | 21        | Fujinami et al. <sup>5</sup>                                |               |            |                        |                 |              | ND                                          |             |
| 11           | c.1531C>T                  | p.Arg511Cys                 | 1                               | 37        | Zernant et al. <sup>22</sup>                                | Not tolerated | PRD        | 0.976                  |                 |              | ND                                          |             |
| 12           | c.1557C>A                  | p.Cys519*                   | 1                               | 12        | This study                                                  |               |            |                        |                 |              | ND                                          |             |
| 12           | c.1648G>A                  | p.Gly550Arg                 | 1                               | 26        | Shroyer et al. <sup>27</sup>                                | Not tolerated | POD        | 0.882                  | 0               | 81.58        | creates a new<br>splice acceptor<br>site    | ND          |
| 12           | c.1757A>G                  | p.Asp586Gly                 | 1                               | 39        | This study                                                  | Not tolerated | POD        | 0.599                  |                 |              | ND                                          |             |
| 12           | c.1760G>A                  | p.Arg587Lys                 | 1                               | 29        | This study                                                  | Not tolerated | POD        | 0.749                  | 84.6            | 74           | weakens the<br>splice donor<br>site by ~13% | ND          |
| 13           | c.1906C>T                  | p.Gln636*                   | 3                               | 2, 18, 30 | Zernant et al. <sup>22</sup>                                |               |            |                        |                 |              | 0.0116                                      | rs145961131 |
| 14           | c.1957C>T                  | p.Arg653Cys                 | 1                               | 36        | Rivera et al. <sup>25</sup>                                 | Not tolerated | PRD        | 0.999                  |                 |              | ND                                          |             |
| 16           | c.2564G>A                  | p.Trp855*                   | 1                               | 29        | Rivera et al. <sup>25</sup>                                 |               |            |                        |                 |              |                                             | rs61752406  |
| 17           | c.2588G>C                  | p.Gly863Ala/<br>p.Gly863del | 2                               | 25, 27    | Lewis et al. <sup>24</sup> /Maugeri<br>et al. <sup>34</sup> | Not tolerated | POD        | 0.864                  |                 |              | 0.6744                                      | rs76157638  |
| 18           | c.2712delG                 | p.Glu905fs                  | 2                               | 5         | This study                                                  |               |            |                        |                 |              | ND                                          |             |
| 19           | c.2861A>C                  | p.Tyr954Ser                 | 1                               | 16        | Aguirre-Lamban et<br>al. <sup>32</sup>                      | Not tolerated | PRD        | 0.959                  |                 |              | ND                                          |             |
| 21           | c.3056C>T                  | p.Thr1019Met                | 1                               | 31        | Rozet et al. <sup>23</sup>                                  | Not tolerated | PRD        | 1.000                  |                 |              | ND                                          | rs201855602 |
| 21           | c.3064G>A                  | p.Glu1022Lys                | 2                               | 28        | Webster et al. <sup>26</sup>                                | Not tolerated | PRD        | 1.000                  |                 |              | ND                                          | rs61749459  |

|       |                   |              |   |                    |                                     |               |     |       |   |                                  |            |
|-------|-------------------|--------------|---|--------------------|-------------------------------------|---------------|-----|-------|---|----------------------------------|------------|
| 21    | c.3081T>G         | p.Tyr1027*   | 2 | 8                  | This study                          |               |     |       |   | ND                               |            |
| 22    | c.3197T>G         | p.Met1066Arg | 1 | 38                 | This study                          | Not tolerated | POD | 0.495 |   | ND                               |            |
| 22    | c.3259G>A         | p.Glu1087Lys | 1 | 10                 | Lewis <i>et al.</i> 1999            | Not tolerated | PRD | 0.997 |   | ND                               | rs61751398 |
| 22    | c.3289A>T         | p.Arg1097*   | 1 | 6                  | This study                          |               |     |       |   | ND                               |            |
| 22    | c.3322C>T         | p.Arg1108Cys | 2 | 11, 13             | Rozet <i>et al.</i> <sup>23</sup>   | Not tolerated | PRD | 0.986 |   | 0.0116                           | rs61750120 |
| 23    | c.3364G>A         | p.Glu1122Lys | 1 | 25                 | Lewis <i>et al.</i> <sup>24</sup>   | Not tolerated | PRD | 1.000 |   | ND                               | rs61751399 |
| 23    | c.3385C>T         | p.Arg1129Cys | 1 | 42                 | Zernant <i>et al.</i> <sup>22</sup> | Not tolerated | PRD | 0.998 |   | ND                               |            |
| 28    | c.4139C>T         | p.Pro1380Leu | 3 | 21, 34, 36         | Lewis <i>et al.</i> <sup>24</sup>   | Not tolerated | PRD | 0.99  |   | 0.0233                           | rs61750130 |
| 28    | c.4216C>T         | p.His1406Tyr | 1 | 14                 | Lewis <i>et al.</i> <sup>24</sup>   | Not tolerated | POD | 0.824 |   | ND                               | rs61750133 |
| 28    | c.4222T>C         | p.Trp1408Arg | 1 | 14                 | Lewis <i>et al.</i> <sup>24</sup>   | Not tolerated | PRD | 0.973 |   | ND                               | rs61750135 |
| 30    | c.4363T>C         | p.Cys1455Arg | 2 | 17, 24             | Fujinami <i>et al.</i> <sup>5</sup> | Not tolerated | PRD | 0.999 |   | ND                               |            |
| 30    | c.4469G>A         | p.Cys1490Tyr | 4 | 9, 11, 38, 42      | Lewis <i>et al.</i> <sup>24</sup>   | Not tolerated | PRD | 0.994 |   | ND                               | rs61751402 |
| 31    | c.4577C>T         | p.Thr1526Met | 1 | 13                 | Lewis <i>et al.</i> <sup>24</sup>   | Not tolerated | PRD | 0.999 |   | ND                               | rs61750152 |
| 36    | c.4918C>T         | p.Arg1640Trp | 1 | 14                 | Briggs <i>et al.</i> <sup>22</sup>  | Not tolerated | PRD | 0.999 |   | ND                               |            |
| 36    | c.5160_5161delCA  | p.Thr1721fs  | 1 | 27                 | This study                          |               |     |       |   | ND                               | rs61750566 |
| 37    | c.5308T>G         | p.Tyr1770Asp | 1 | 34                 | This study                          | Not tolerated | PRD | 1.000 |   | ND                               |            |
| 37    | c.5213_5214insTGC | p.Ala1739dup | 1 | 37                 | This study                          |               |     |       |   | ND                               |            |
| 42    | c.5882G>A         | p.Gly1961Glu | 5 | 31, 33, 35, 37, 39 | Lewis <i>et al.</i> <sup>24</sup>   | Not tolerated | PRD | 1.000 |   | 0.4186                           | rs1800553  |
| 44    | c.6079C>T         | p.Leu2027Phe | 3 | 22, 40, 41         | Lewis <i>et al.</i> <sup>24</sup>   | Not tolerated | PRD | 1.000 |   | 0.0349                           | rs61751408 |
| 44    | c.6088C>T         | p.Arg2030*   | 2 | 2, 25              | Lewis <i>et al.</i> <sup>24</sup>   |               |     |       |   | ND                               | rs61751383 |
| 45    | c.6215G>A         | p.Ser2072Asn | 1 | 32                 | This study                          | Not tolerated | PRD | 1.000 |   | ND                               |            |
| 47    | c.6449G>A         | p.Cys2150Tyr | 1 | 26                 | Fishman <i>et al.</i> <sup>16</sup> | Not tolerated | PRD | 1.000 |   | 0.0116                           | rs61751384 |
| IVS35 | c.5018+2T>C       | splice       | 1 | 32                 | Fujinami <i>et al.</i> <sup>8</sup> |               |     | 81.15 | 0 | eliminates the splice donor site | ND         |

|       |                                            |           |   |                                  |                              |       |       |                                       |        |           |
|-------|--------------------------------------------|-----------|---|----------------------------------|------------------------------|-------|-------|---------------------------------------|--------|-----------|
| IVS36 | c.5196+1G>A                                | splice    | 1 | 6                                | Shroyer et al. <sup>27</sup> | 83.28 | 0     | eliminates the splice donor site      | ND     |           |
| IVS38 | c.5461-10T>C                               | Uncertain | 9 | 7, 9, 10, 15, 16, 18, 20, 22, 41 | Briggs et al. <sup>20</sup>  |       |       |                                       | 0.0349 | rs1800728 |
| IVS40 | c.5714+5G>A                                | splice    | 1 | 24                               | Cremers et al. <sup>19</sup> | 85.49 | 73.33 | weakens the splice donor site by ~14% | 0.1512 |           |
| IVS47 | c.6479+1G>A                                | splice    | 2 | 3                                | Zernant et al. <sup>22</sup> | 87.25 | 0     | eliminates the splice donor site      | ND     |           |
| IVS48 | c.6729+4_6729+18d<br>eIAGTTGGCCCTG<br>GGGC | splice    | 1 | 33                               | Littink et al. <sup>31</sup> |       |       |                                       | ND     |           |
| IVS49 | c.6817-2A>C                                | splice    | 1 | 30                               | This study                   | 93.6  | 0     | eliminates the splice acceptor site   | ND     |           |

CV = consensus value; EVS = Exon variant server; Het = heterozygous; Hom = homozygous; HSF = human splicing finder; Hum Var Score = human var score; IVS = intervening sequence; NA = not applicable; ND= not detected; POD = possibly damaging; PRD = probably damaging; Pt = patient; SIFT = Sorting Intolerant From Tolerant ; WT = wild type.

SIFT (version 4.0.4) results are reported to be tolerant if tolerance index  $\geq 0.05$  or intolerant if tolerance index  $< 0.05$ . [[http://sift.bii.a-star.edu.sg/www/SIFT\\_BLink\\_submit.html/](http://sift.bii.a-star.edu.sg/www/SIFT_BLink_submit.html/). Accessed February 1, 2013.] Polyphen 2 (version 2.1) appraises mutations qualitatively as Benign, Possibly Damaging or Probably Damaging based on the model's false positive rate. [<http://genetics.bwh.harvard.edu/pph2/>. Accessed November 1, 2013.] HumanVar-trained model of Polyphen 2 was selected, since diagnostics of mendelian diseases requires distinguishing mutations with drastic effects from all the remaining human variation, including abundant mildly deleterious alleles. The cDNA is numbered according to Ensemble transcript ID ENST00000370225, in which +1 is the A of the translation start codon. Human Splicing Finder (HSF, version 2.4.1) reports the results from the HSF matrix: the higher the consensus value, the stronger the predicted splice site. The values for the wildtype and mutant sequences are shown; the larger the difference between these values, the greater the chance that the variant can affect splicing [<http://www.umd.be/HSF/>. Accessed November 1, 2013.]. EVS denotes the allele frequencies of variants on the Exome Variant Server, NHLBI Exome Sequencing Project, Seattle, WA, USA. [<http://snp.gs.washington.edu/EVS/>. Accessed February 1, 2013.]
